# Supplementary material for: Physicochemical characterizations of functional hybrid liposomal nanocarriers formed using photo-sensitive lipids
Source: PubMed Central journal article supplement (PMC5390264; doi:10.1038/srep46257), 2017-04-13
Supplement: srep46257-s1.pdf [file srep46257-s1.pdf]

## Supplementary Information

### Physicochemical characterizations of functional hybrid liposomal nanocarriers formed using photo-sensitive lipids

Sumit Kumar Pramanik<sup>a,b</sup>, Patricia Losada-Pérez<sup>a,b</sup>, Gunter Reekmans<sup>a,b</sup>, Robert Carleer<sup>a,b</sup>, Marc D'Olieslaeger<sup>a,b</sup>, Dirk Vanderzande<sup>a,b</sup>, Peter Adriaensens<sup>a,b</sup>, and Anitha Ethirajan<sup>\*a,b</sup>

<sup>a</sup> Institute for Materials Research (IMO), Hasselt University, Wetenschapspark 1 and Agoralaan D, 3590 Diepenbeek, Belgium

<sup>b</sup> IMEC, associated lab IMOMECE, Wetenschapspark 1, 3590 Diepenbeek, Belgium

Email: [anitha.ethirajan@uhasselt.be](mailto:anitha.ethirajan@uhasselt.be)

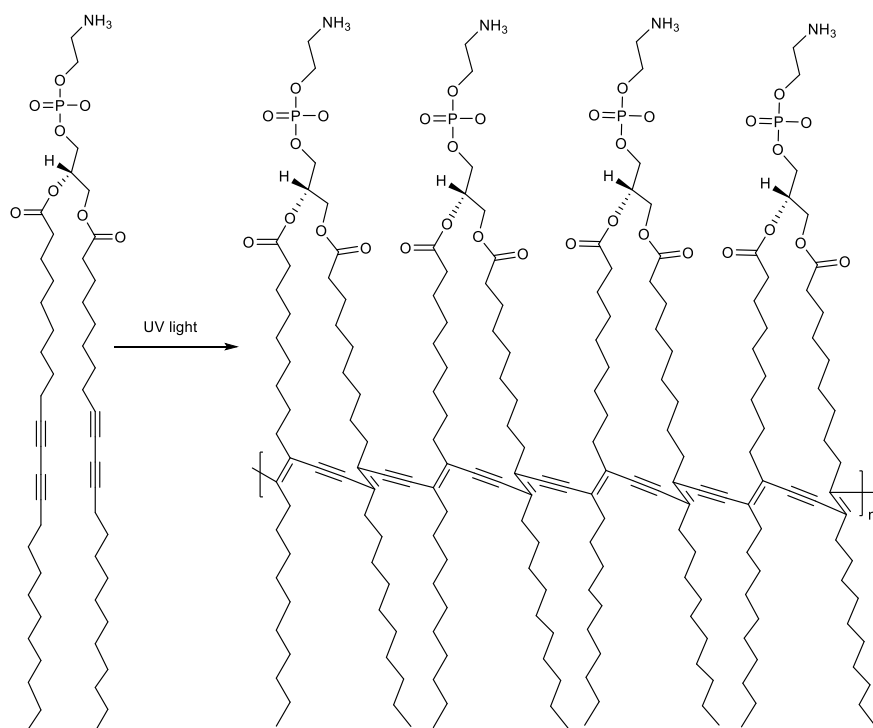

**Figure S1:** Scheme depicting the photo-polymerization reaction.

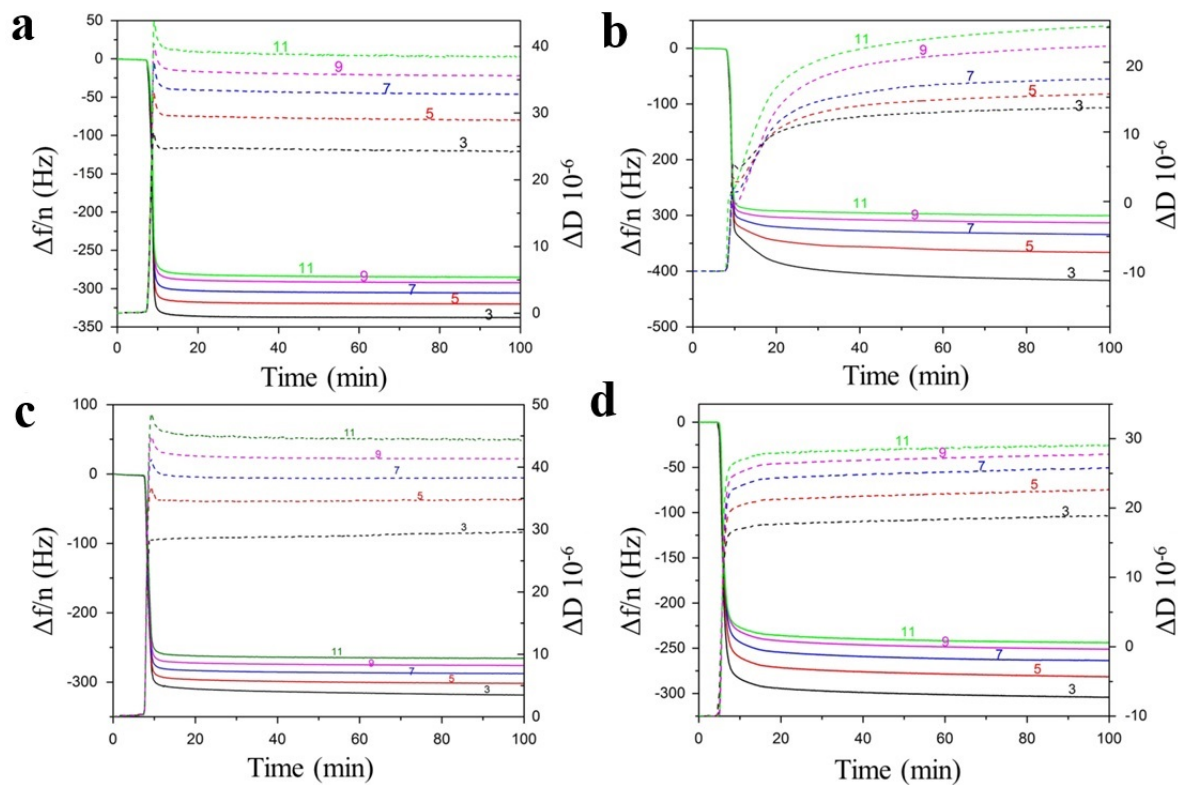

**Figure S2:** Time evolution of  $\Delta f/n$  (solid lines) and  $\Delta D$  (dashed lines) of different overtones during a QCM-D experiment of (a) DPPC and (b) DPPC + 20 % DTPE liposome adsorption at 20 °C and (c) DMPC and (d) DMPC + 20 % DTPE liposome adsorption at 16 °C on gold- coated quartz sensor.
